# Supplementary material
Source: ML conference proceedings conference paper supplement (https://openreview.net/forum?id=6xLTuBFR5D)

Pareto frontier

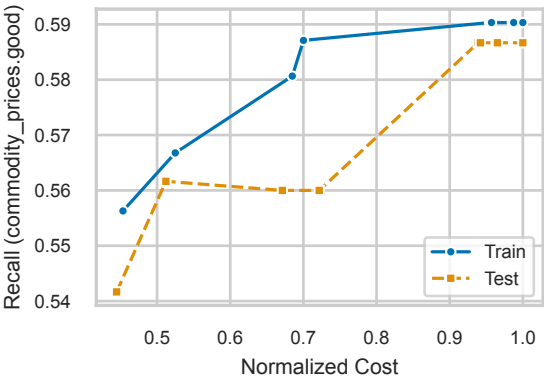

Supplement: supplementary_material [file pareto_frontier.pdf › delm-main/examples/cost_vs_coverage/pareto_frontier.pdf]

Pareto frontier (deg-2, concave)

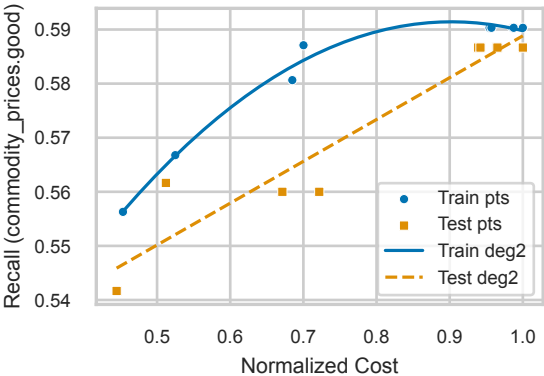

Supplement: supplementary_material [file pareto_frontier_deg2.pdf › delm-main/examples/cost_vs_coverage/pareto_frontier_deg2.pdf]
